# Supplementary material for: Determination of the attenuation factor in fluorene-based molecular wires
Source: Royal Society of Chemistry journal article supplement (doi:10.1039/b711678k), 2007-01-01
Supplement: b711678k.pdf [file b711678k.pdf]

## Electronic Supplementary Information for Chemical Communications

### Experimental Section

$^{13}\text{C}$  and  $^1\text{H}$  NMR spectra were recorded with either a 300, or 500 MHz spectrometer for  $^1\text{H}$ -NMR and either a 75 or 125 MHz spectrometer for  $^{13}\text{C}$ -NMR. Chemical shifts are given as  $\delta$  values (internal standard: TMS). Cyclic voltammograms were recorded on a potentiostat/galvanostat equipped with a software GPES for Windows version 4.8. The electrochemical analyses were carried out using a GCE (glassy carbon) as working electrode, SCE (standard calomel) as reference electrode,  $\text{Bu}_4\text{NClO}_4$  as supporting electrolyte, and *o*-dichlorobenzene/acetonitrile (ratio 4:1 v/v) as solvent at a scan rate of 100 mV/s. The purity of compounds **2a,b** and **3a,b** has been proven by HPLC chromatography (column: Cosmosil Buckyprep, 4.6 I. D x 250 mm; solvent: toluene/acetonitrile 8/2 v/v; flow rate:  $0.5 \text{ ml min}^{-1}$ ).

### 7-(9,10-di(1,3-dithiol-2-ylidene)-9,10-dihydroanthracen-6-yl)-9,9-dihexyl-9H-fluorene-2-carbaldehyde (**2a**).

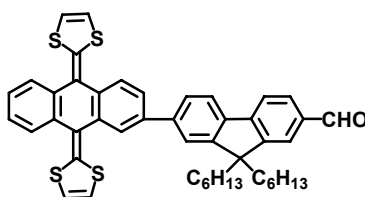

2-Iodo-*ex*TTF (112 mg, 1.1 equiv., 0.22 mmol),  $\text{K}_2\text{CO}_3$  (210 mg, 1.6 mmol, 8.0 equiv.),  $\text{Pd}(\text{PPh}_3)_2\text{Cl}_2$  (10 mg) and 7-(4,4,5,5-tetramethyl-1,3,2-dioxaborolan-2-yl)-9,9-dihexylfluorene-2-carbaldehyde **1a** (98 mg, 1 equiv., 0.2 mmol) were reacted via standard Suzuki-Miyaura coupling and purified using toluene/hexane as eluent to yield **2a** (77 mg, 52%) as an orange solid.

$^1\text{H}$ -NMR (300 MHz,  $\text{CDCl}_3$ ),  $\delta$ : 10.08 (s, 1H, CHO), 8.02 (d, 1H,  $J=1.8$  Hz, ArH), 7.91-7.82 (m, 5H, ArH), 7.77- 7.68 (m 4H, ArH), 7.65-7.61 (dd 1H,  $J=1.8$  Hz,  $J= 8.2$  Hz,

$\text{Ar}_{\text{extff}}\text{H}$ ), 7.33-7.29 (m, 2H,  $\text{Ar}_{\text{extff}}\text{H}$ ), 6.34 (s, 2H,  $\text{CH}_{\text{extff}}$ ), 6.33 (s, 2H,  $\text{CH}_{\text{extff}}$ ), 2.08 (dd 4H,  $J=7.3\text{Hz}$ ,  $J=9.0\text{Hz}$ ,  $\text{CH}_2_{\text{aliph}}$ ) 1.14- 1.06 (m, 12H), 0.78-0.65 (m, 10H).

$^{13}\text{C}$ -NMR (300 MHz,  $\text{CDCl}_3$ ),  $\delta$ : 192.82, 153.33, 147.67, 141.84, 139.20, 139.01, 136.41, 136.37, 136.31, 135.04, 131.07, 126.71, 126.50, 126.46, 125.90, 125.38, 124.96, 124.12, 123.45, 122.59, 122.25, 121.96, 121.77, 120.42, 117.76, 117.71, 117.63, 117.48, 55.77, 40.66, 31.90, 30.12, 30.04, 24.24, 22.98, 14.41. ESI-MS,  $m/z$ : 763  $[\text{M}+\text{Na}]^+$ .

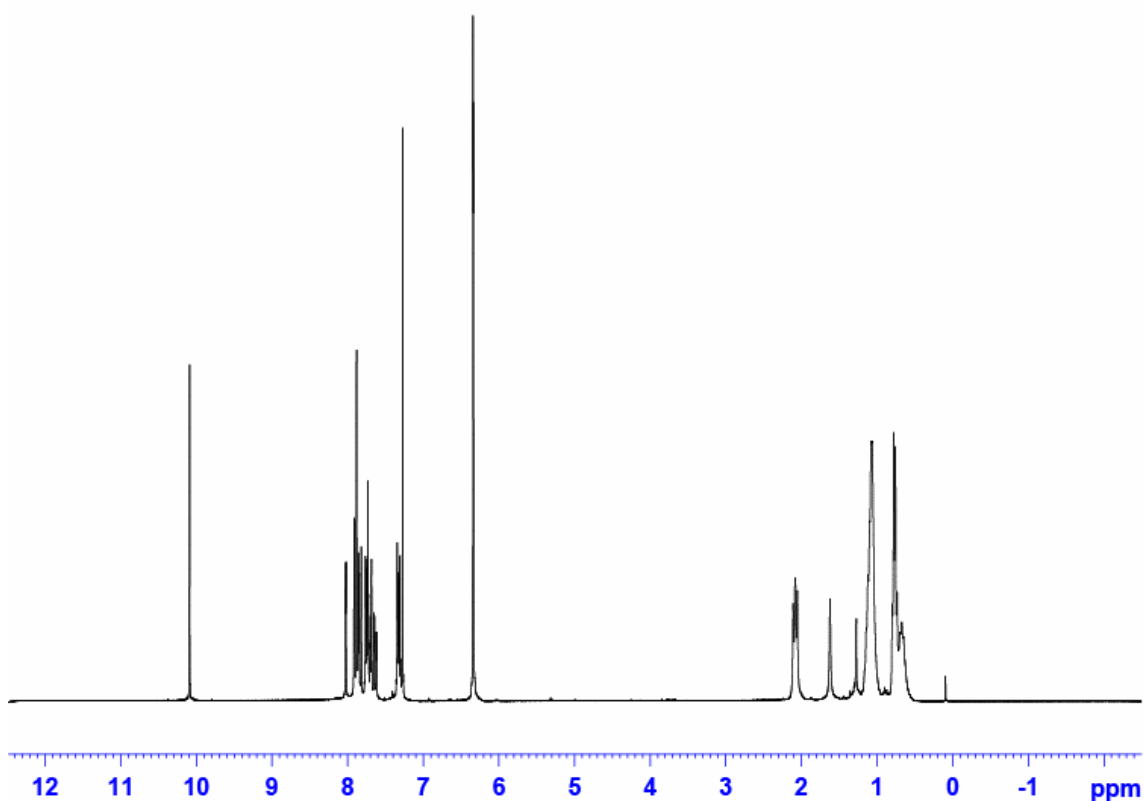

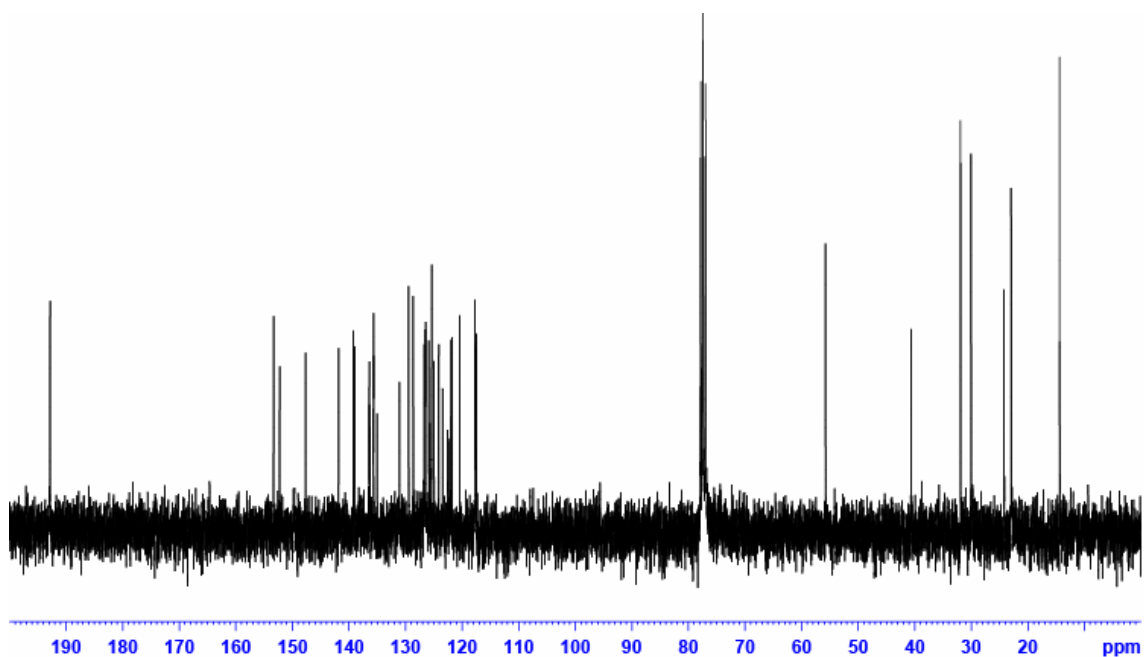

HPLC diagram

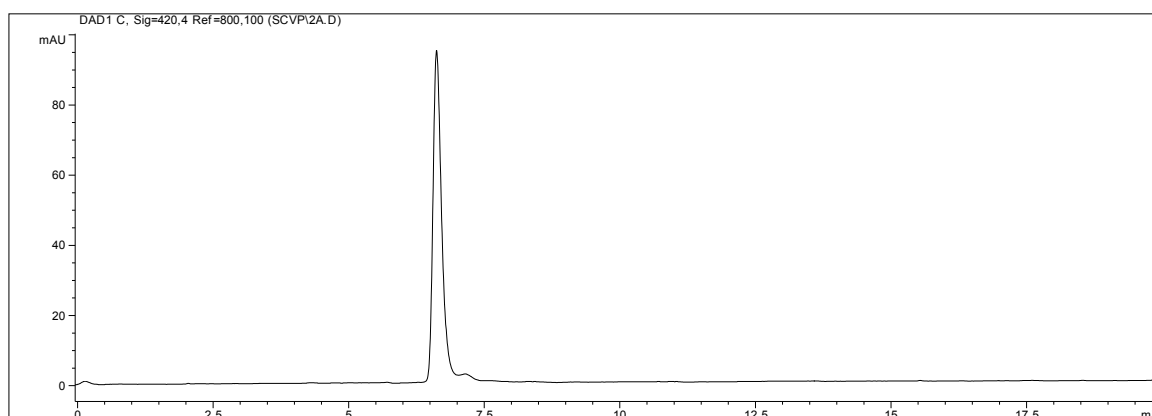

UV spectrum

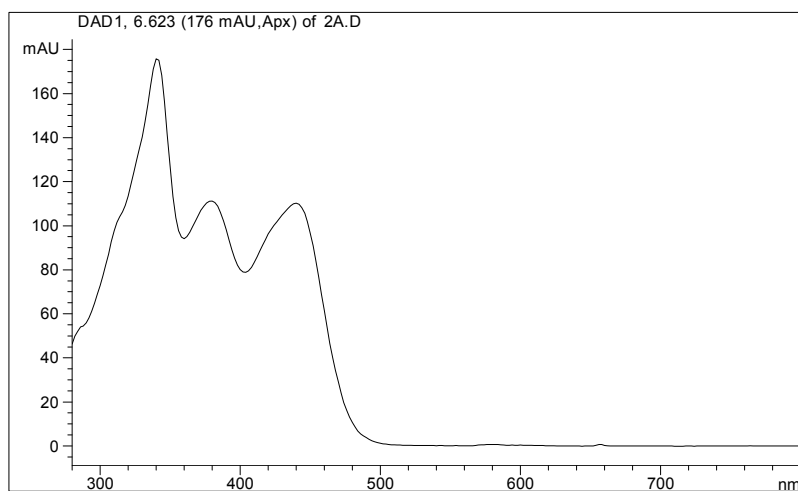

**7'-(2-(9,10-di(1,3-dithiol-2-ylidene)-9,10-dihydroanthracen-6-yl)-9,9-dihexyl-9H-fluoren-7-yl)-9',9'-dihexyl-9'H-fluorene-2'-carbaldehyde (2b).**

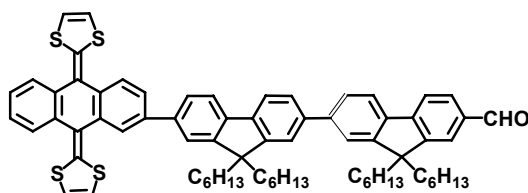

2-Iodo-*ex*TTF (112 mg, 1.5 equiv., 0.22 mmol), K<sub>2</sub>CO<sub>3</sub> (210 mg, 1.6 mmol, 8.0 equiv.), Pd(PPh<sub>3</sub>)<sub>2</sub>Cl<sub>2</sub> (10 mg) and **1b** (126 mg, 1 equiv., 0.15 mmol) were reacted via Suzuki coupling and purified using toluene/hexane as eluent to yield **2b** (66%).

<sup>1</sup>H-NMR (500 MHz, CDCl<sub>3</sub>), δ: 10.12 (s, 1H, CHO), 8.06 (d, 1H, *J*=1.7 Hz, ArH), 7.96-7.83 (m, 6H, ArH), 7.79- 7.68 (m, 8H, ArH), 7.67-7.65 (dd, 1H, *J*=1.9 Hz, *J*= 8.0 Hz, Ar<sub>extttf</sub>H), 7.35-7.31 (m, 3H, Ar<sub>extttf</sub>H), 6.33 (s, 2H), 6.31 (d, 2H, *J*= 2.1 Hz), 2.13 (bt, 8H, *J*= 8.2 Hz, CH<sub>2</sub> aliph), 1.18- 1.06 (m, 22H), 0.85-0.60 (m, 22H).

<sup>13</sup>C-NMR (125 MHz, CDCl<sub>3</sub>), δ: 192.75; 153.4; 152.4; 152.3; 152.2; 147.7; 142.8; 140.9; 140.5; 140.4; 140.2; 139.5; 139.1; 139.1; 136.4; 136.3; 136.1; 135.8; 135.7; 135.6; 134.3; 131.1 ; 129.5; 129.2; 128.7; 127.6; 127.0; 126.7; 126.5; 126.4; 125.9; 125.7; 125.4; 124.9; 124.1; 123.5; 122.8; 122.4; 122.0; 121.9; 121.7; 120.6; 120.5; 120.4; 117.7; 117.6; 117.5; 55.8; 55.7; 40.8; 40.6; 31.9; 31.8; 30.2; 30.1; 30.0; 24.3; 24.2; 23.1; 23.0; 22.9; 14.5; 14.4. ESI-MS, *m/z*: 1096 [M+Na]<sup>+</sup>.

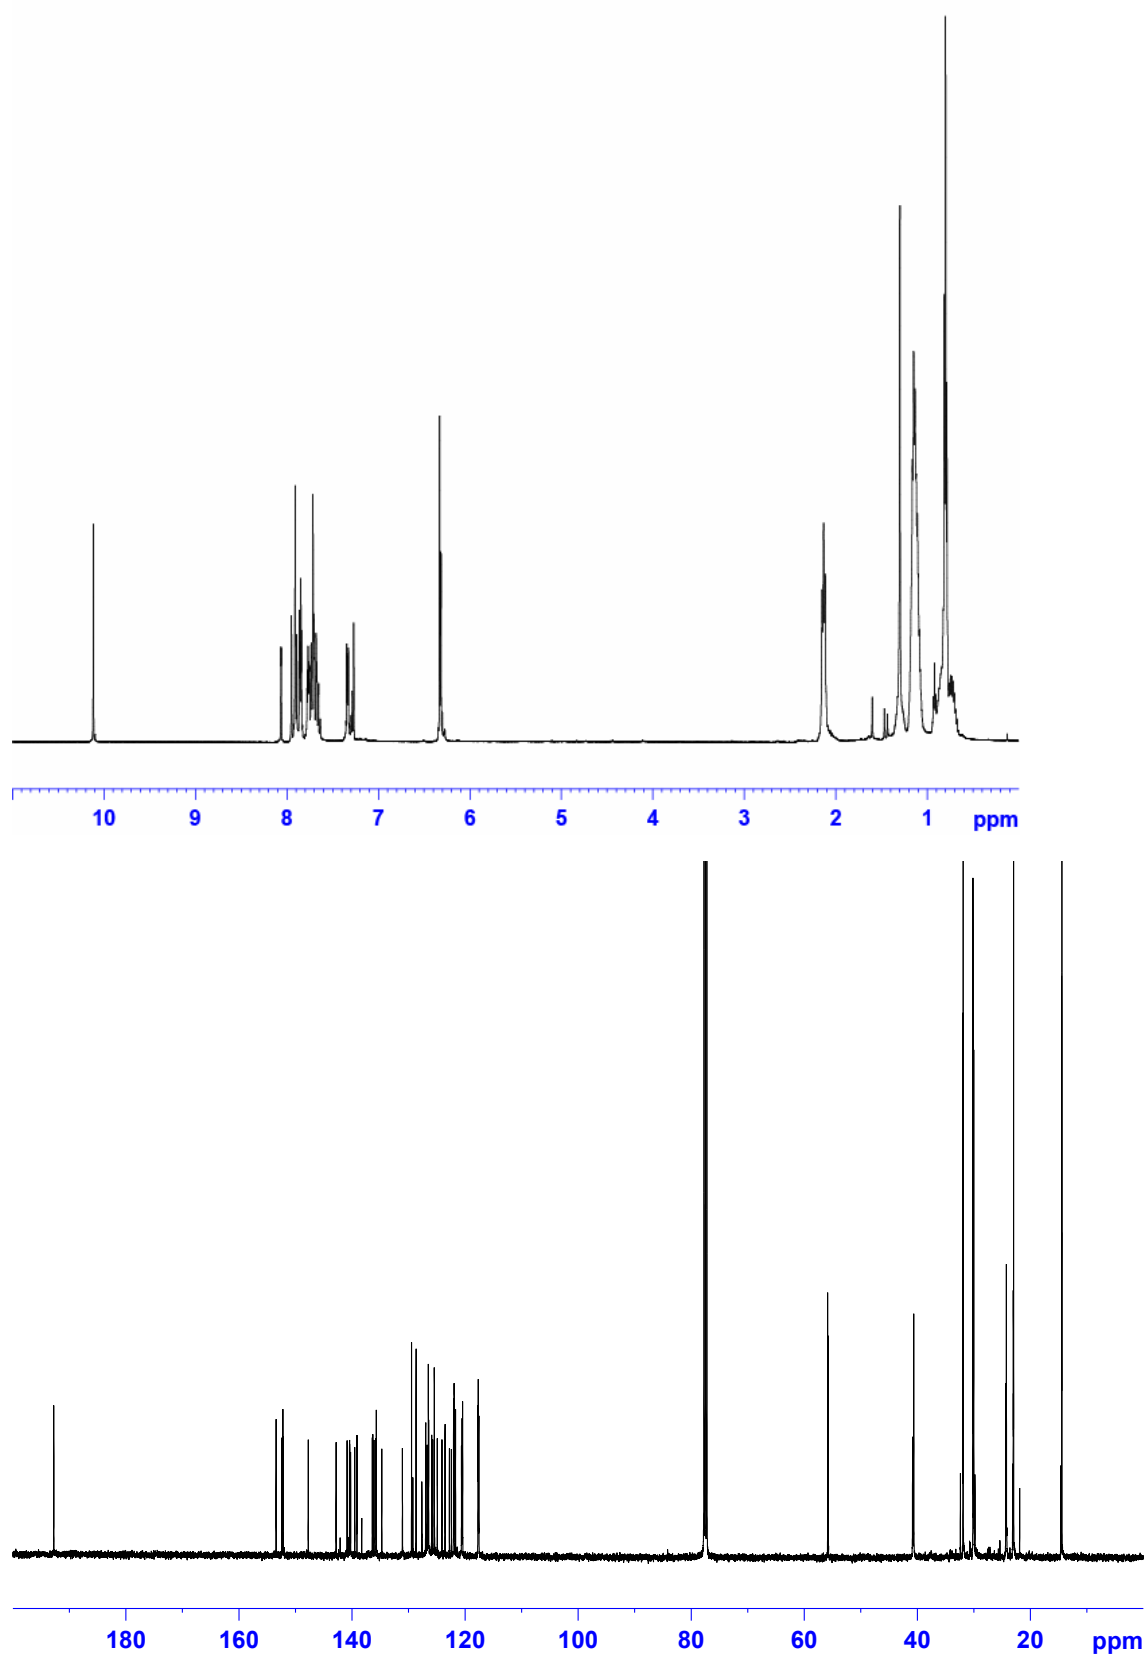

HPLC diagrams

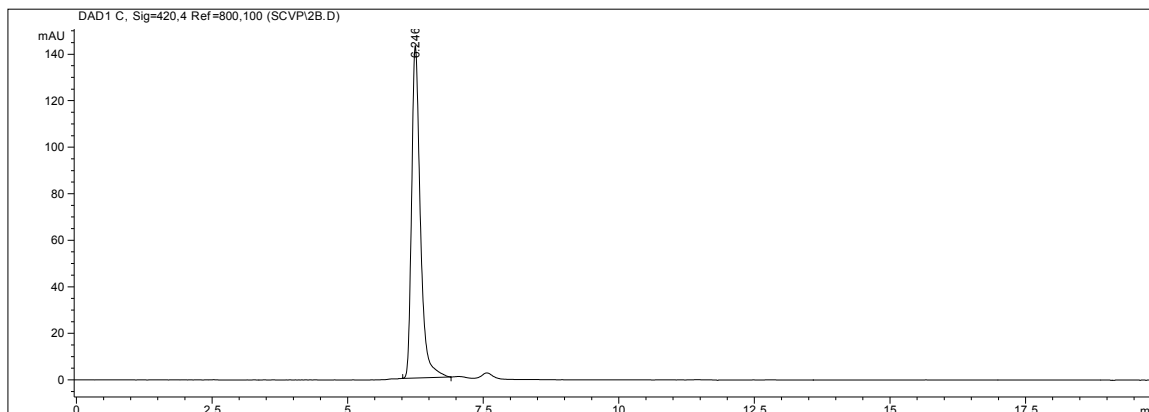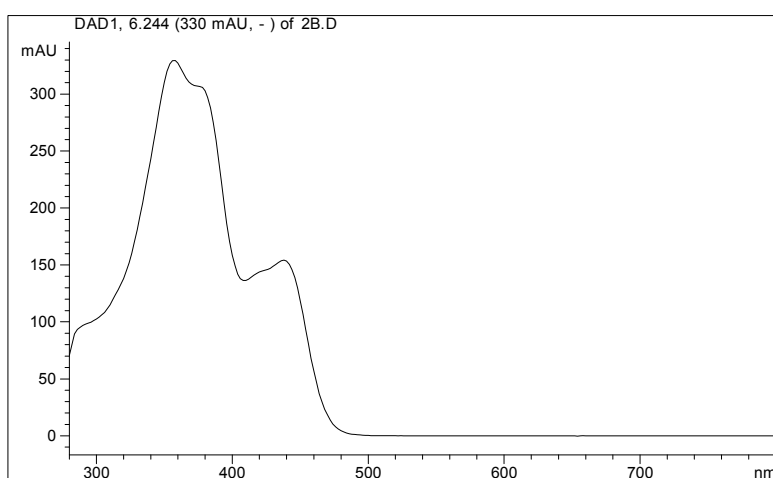

**exTTF-Fl-C<sub>60</sub> (3a).**

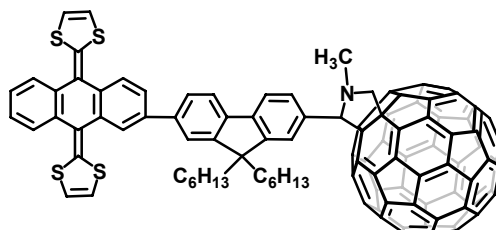

Sarcosine (90 mg), C<sub>60</sub> (400 mg) and exTTF-fluorene aldehyde **2a** (100mg) were refluxed in chlorobenzene under argon and without light for 2 h. The solvent was removed *in vacuo*

in the dark. The purification was carried out, in the dark, on a silica gel column (eluent CS<sub>2</sub> then toluene). Yield: 27%.

<sup>1</sup>H-NMR (500 MHz, CDCl<sub>3</sub>), δ: 8.02 (bs, 2H, ArH), 7.81 (d, 1H, *J*=8.1Hz), 7.77 (d, 1H, *J*=7.9Hz), 7.75 (dd, 2H, *J*=3.1Hz, *J*=5.6Hz), 7.65 (d, 1H, *J*=8.1Hz), 7.62 (m, 2H), 7.37 (m, 1H), 7.32 (m, 3H), 6.34 (bs, 4H), 5.06 (bd, 2H, *J*=10.0Hz), 4.34 (d, 1H, *J*=9.4Hz), 2.91 (s, 3H), 2.03 (bs, 4H), 1.3-0.5 (bm, 22H).

<sup>13</sup>C-NMR (125 MHz, CDCl<sub>3</sub>), δ: 156.15; 153.48; 151.63; 147.27; 146.78; 146.47; 146.30; 146.23; 146.20; 146.14; 146.11; 146.08; 145.91; 145.72; 145.55; 145.51; 145.49; 145.44; 145.34; 145.29; 145.25; 145.21; 145.13; 144.67; 144.37; 143.09; 142.97; 142.67; 142.54; 142.24; 142.14; 142.13; 142.05; 142.01; 141.89; 141.75; 141.67; 141.51; 141.31; 140.17; 140.12; 140.01; 139.83; 139.41; 139.04; 136.62; 135.91; 135.85; 135.78; 135.53; 135.32; 135.29; 134.24; 129.68; 128.59; 126.01; 125.98; 125.93; 125.41; 124.96; 124.41; 123.62; 122.30; 121.98; 121.26; 120.14; 117.22; 117.13; 83.85; 70.01; 69.01; 55.26; 40.598; 40.03; 31.72; 31.62; 29.76; 23.87; 22.82; 22.63; 14.10. ESI-MS, *m/z*: 1488 [M]<sup>+</sup>.

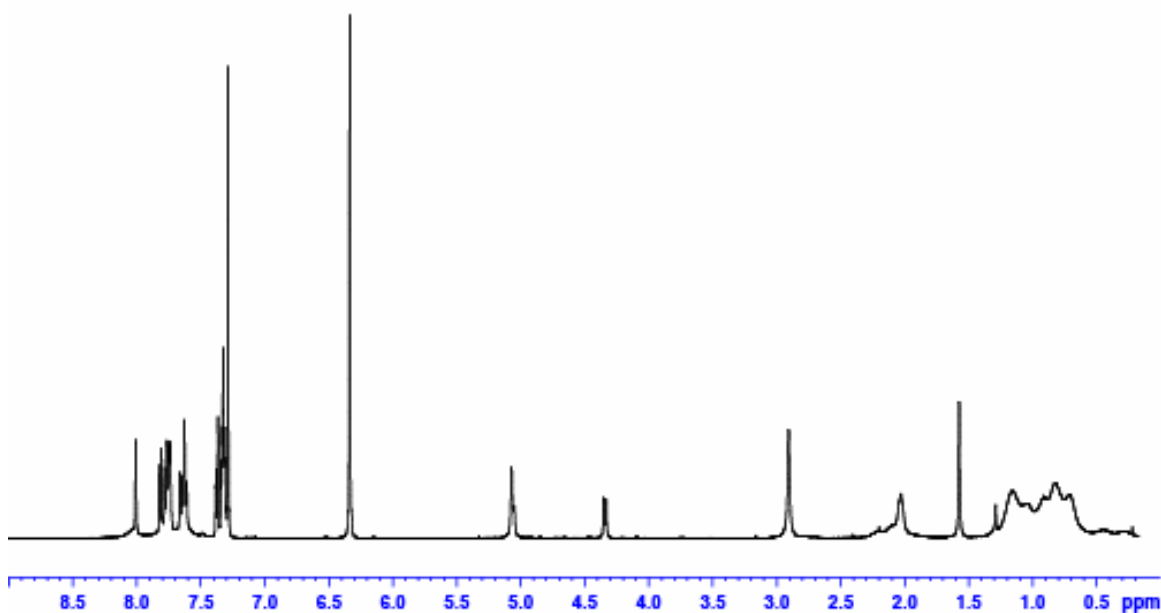

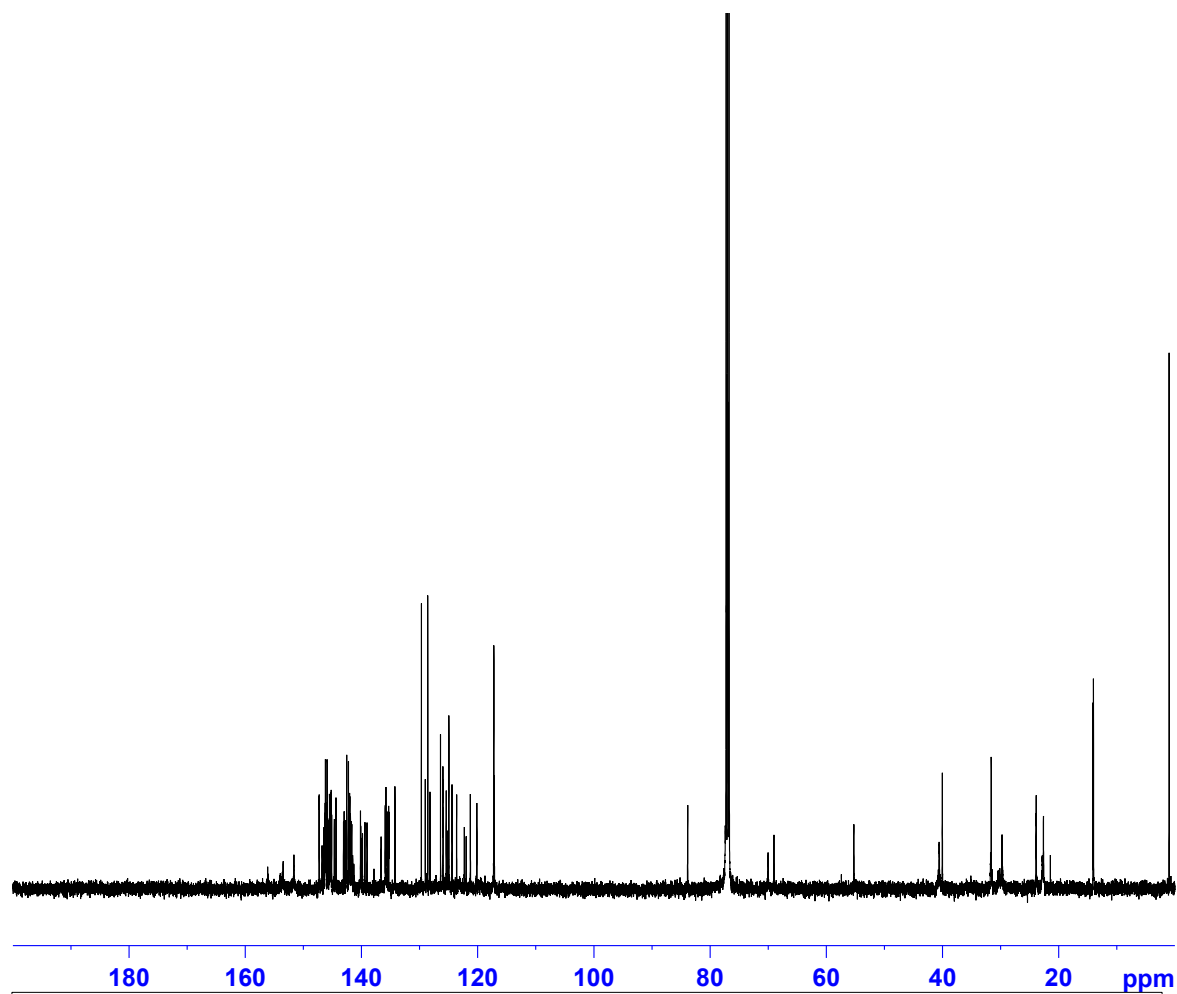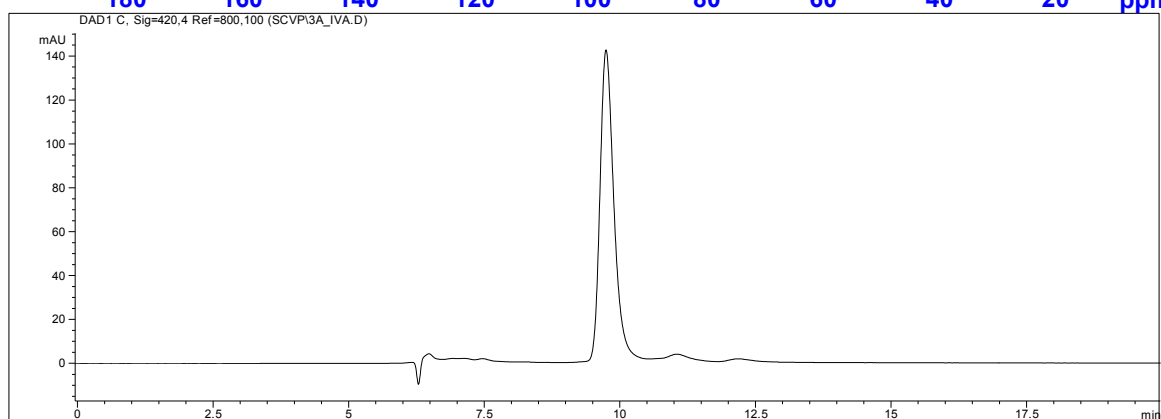



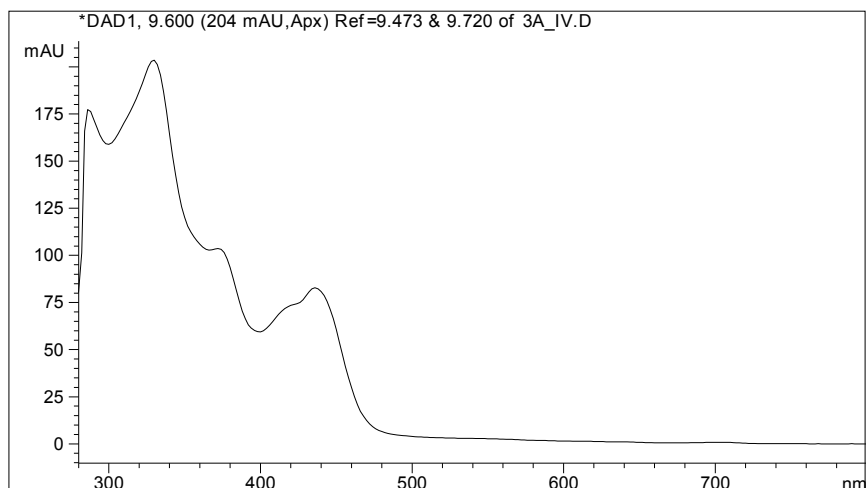**exTTF-Fl<sub>2</sub>-C<sub>60</sub> (3b).**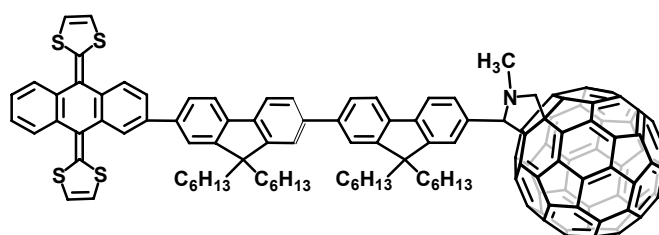

C<sub>60</sub> (280 mg, 0.4 mmol), *ex*TTF-Fl<sub>2</sub>-CHO **2b** (107 mg, 0.1 mmol) and sarcosine (40 mg, 0.5 mmol) were reacted via the 1,3-dipolar cycloaddition procedure (under argon and protected against light) for 4 h. Purification in the dark using CS<sub>2</sub>, followed by toluene as eluent yielded **3b** (44 mg, 24%) as a black solid.

<sup>1</sup>H-NMR (500 MHz, CDCl<sub>3</sub>), δ: 8.03 (d, 2H, *J*=1.7 Hz, ArH); 7.91-7.52 (bm, 15H, ArH); 7.35-7.29 (m, 2H, Ar<sub>extif</sub>H); 6.33 (m, 4H); 5.06 (s, 1H, CHN); 5.04 (d, *J*=10.5 Hz, 1H, CH<sub>2</sub>N); 4.33 (d, *J*=10.5 Hz, 1H, CH<sub>2</sub>N); 2.90 (bs, 3H, NCH<sub>3</sub>); 2.08 (bs, 8H, CH<sub>2</sub> aliph); 1.25-0.98 (bm, 22H), 0.95-0.60 (bm, 22H).

<sup>13</sup>C-NMR (125 MHz, CDCl<sub>3</sub>), δ: 154.43; 154.06; 153.89; 152.29; 152.13; 152.09; 147.70; 147.23; 146.92; 146.73; 146.67; 146.63; 146.57; 146.53; 146.50; 146.34; 146.15; 145.97; 145.94; 145.91; 145.88; 145.77; 145.72; 145.68; 145.64; 145.55; 145.10; 144.87; 144.81; 144.78; 143.52; 143.40; 143.11; 142.97; 142.67; 142.57; 142.55; 142.49; 142.44; 142.31; 142.16; 142.10; 141.95; 141.73; 141.12; 140.80; 140.60; 140.56; 140.50; 140.40; 140.33; 140.28; 140.00; 139.84; 139.55; 137.06; 137.02; 136.33; 136.31; 136.25; 136.14; 135.98; 135.75; 135.72; 134.63; 129.22; 127.62; 126.55; 126.51; 126.47; 126.44; 125.87; 125.41; 125.22; 124.89; 124.05; 122.72; 122.41; 121.98; 121.85; 121.81; 121.72; 120.51; 120.41; 117.68; 117.61; 84.26; 70.46; 69.45; 68.41; 55.73; 55.68; 40.97; 40.80; 40.50; 32.13; 32.02; 31.92; 30.15; 26.05; 24.30. ESI-MS, *m/z*: 1843 [M+Na]<sup>+</sup>;

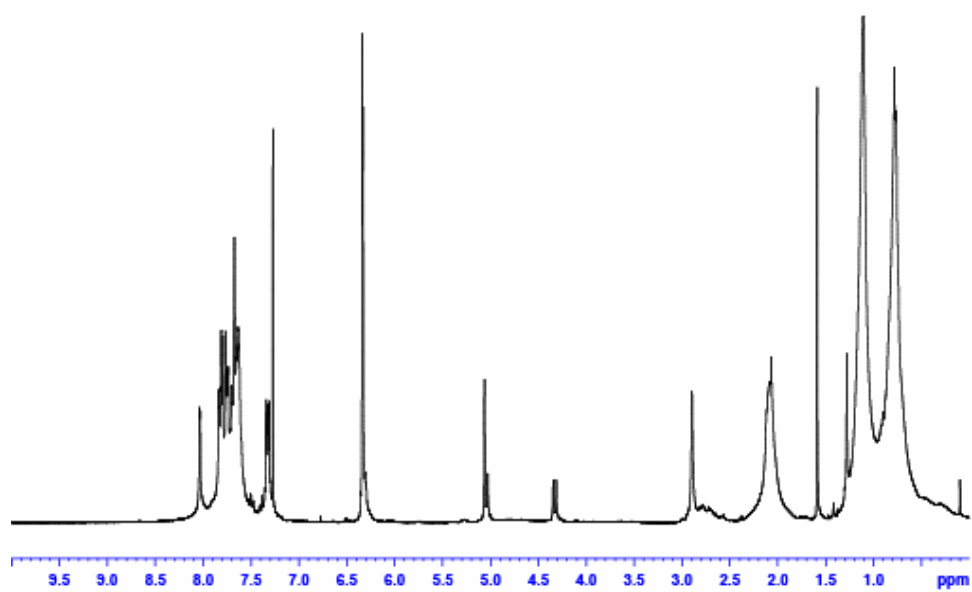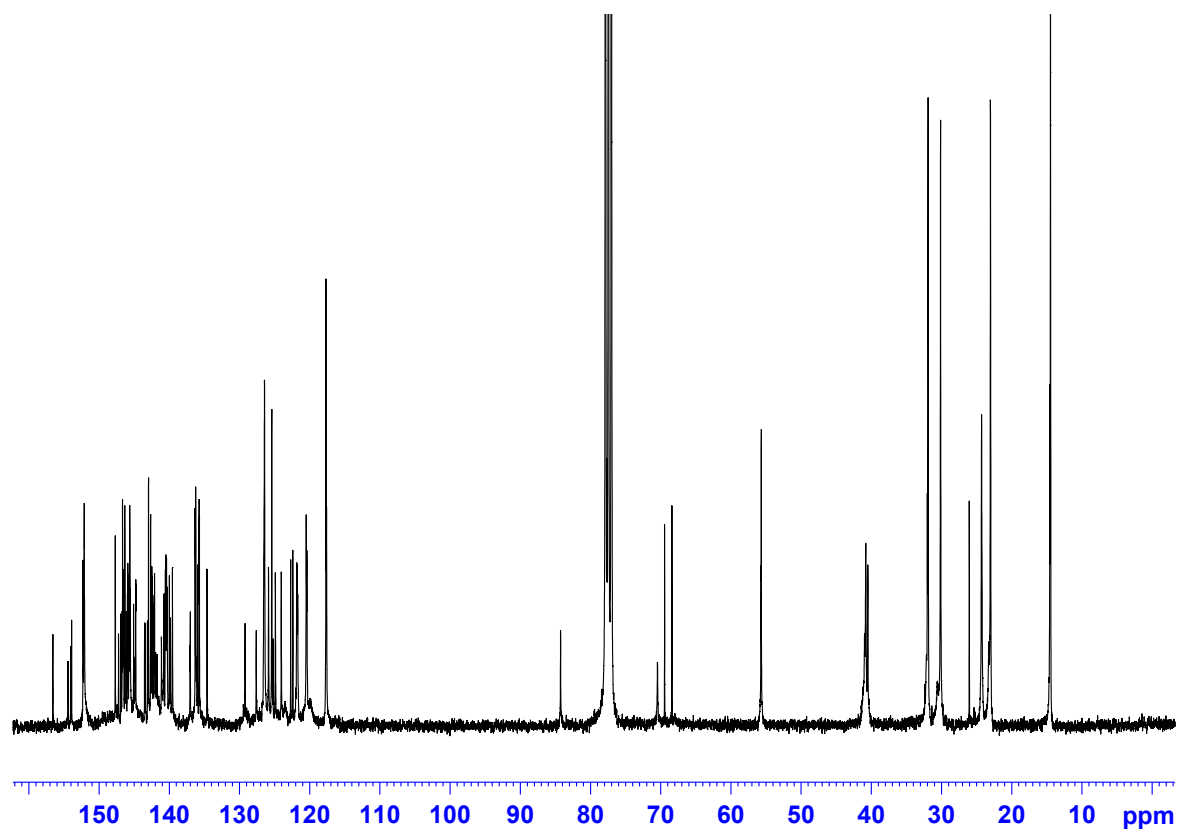

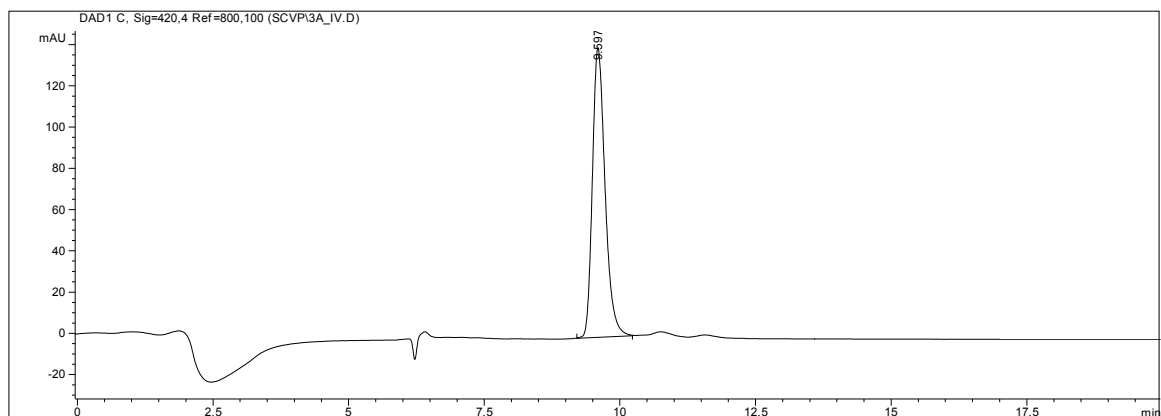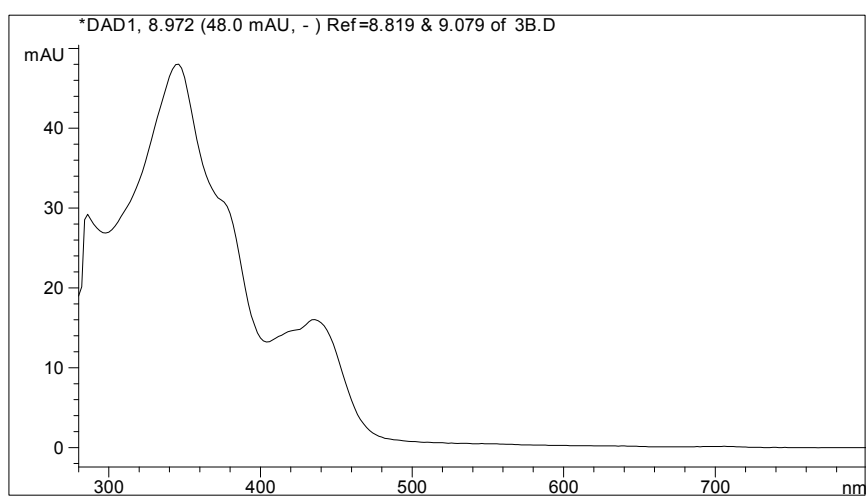

Table 1. Redox potential values of triads **3a,b**.<sup>a</sup>

| Compound                                    | $E^1_{\text{red}}$ | $E^2_{\text{red}}$ | $E^3_{\text{red}}$ | $E^4$              | $E^1_{\text{ox}}$ | $E^2_{\text{ox}}$ | $E^3_{\text{ox}}$ |
|---------------------------------------------|--------------------|--------------------|--------------------|--------------------|-------------------|-------------------|-------------------|
| <b>C<sub>60</sub></b>                       | -761 <sup>b</sup>  | -1171 <sup>b</sup> | -1632 <sup>b</sup> | -2098 <sup>b</sup> |                   |                   |                   |
| <b>N-methyl fulleropyrrolidine</b>          | -863 <sup>b</sup>  | -1263 <sup>b</sup> | -1802 <sup>b</sup> |                    | 1140              | 1710              |                   |
| <b>I-exTTF</b>                              |                    |                    |                    |                    | 232               | 1643              |                   |
| <b>1a</b><br>(BE-FL-CHO)                    | -1848              |                    |                    |                    | 1380              |                   |                   |
| <b>1b</b><br>(BE-FI-FI-CHO)                 |                    |                    |                    |                    | 1250              |                   |                   |
| <b>2a</b><br>(exTTF-FI-CHO)                 | -1978              |                    |                    |                    | 234               | 1458              |                   |
| <b>2b</b><br>(exTTF-FI-FI-CHO)              |                    |                    |                    |                    | 259               | 1280              |                   |
| <b>Fl<sub>2</sub>-CHO<sup>c</sup></b>       | -2029              |                    |                    |                    | 1295              | 1608              | 1873              |
| <b>3a</b><br>(exTTF-FI-C <sub>60</sub> )    | -874 <sup>b</sup>  | -1291 <sup>b</sup> | -1834 <sup>b</sup> | /                  | 215               | 1091              | 1665              |
| <b>3b</b><br>(exTTF-FI-FI-C <sub>60</sub> ) | -889 <sup>b</sup>  | -1287 <sup>b</sup> | -1787 <sup>b</sup> | /                  | 281               | 1277              | 1682              |

a) Potentials in mV; scan rate 100 mVs<sup>-1</sup>; glassy carbon working electrode, Ag/AgNO<sub>3</sub> reference electrode, Pt counter electrode; 0.1 M Bu<sub>4</sub>NClO<sub>4</sub> in *o*-DCB / CH<sub>3</sub>CN (4:1 v/v); b) half wave potential values ( $E_{1/2}$ ); c) ref. C. Van der Pol, M. R. Bryce, M. Wielopolski, C. Atienza-Castellanos, D. M. Guldi, S. Filippone, N. Martín *J. Org. Chem.* in press.

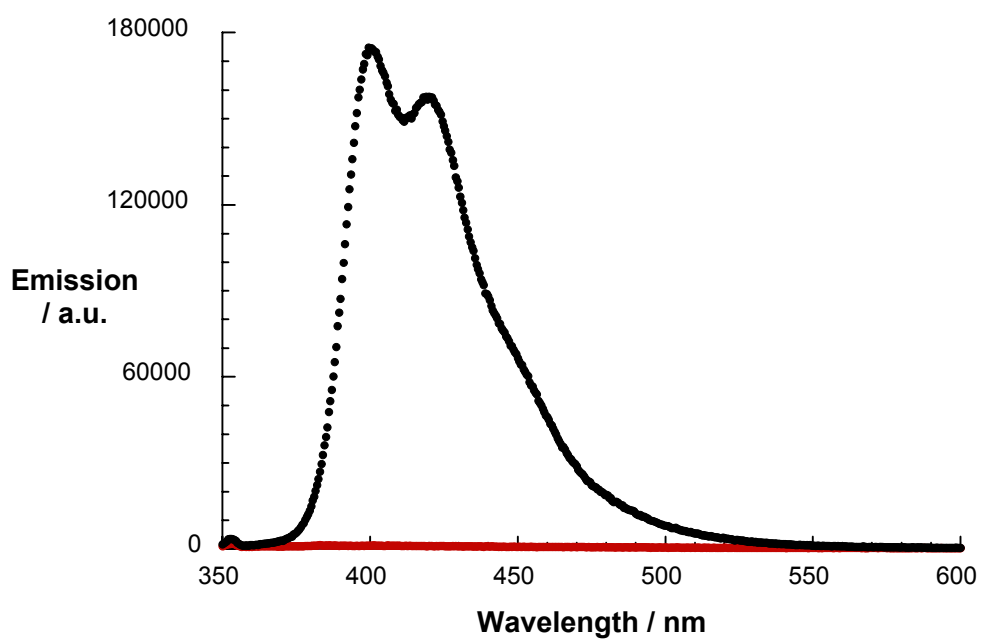

**Figure S1:** Room temperature fluorescence spectra of oFl<sub>2</sub> (black) and C<sub>60</sub>-oFl<sub>2</sub>-exTTF (brown) in THF recorded with solutions that exhibit optical absorptions at the 360 nm excitation wavelength of 0.45.

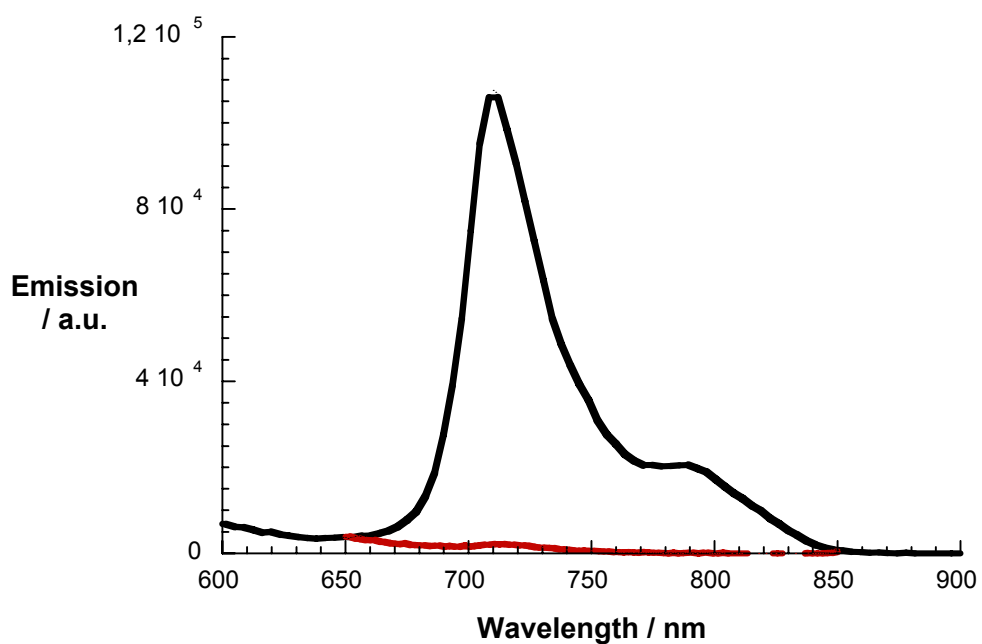

**Figure S2:** Room temperature fluorescence spectra of C<sub>60</sub> (black) and C<sub>60</sub>-oFl<sub>1</sub>-exTTF (brown) in THF recorded with solutions that exhibit optical absorptions at the 435 nm excitation wavelength of 0.22.

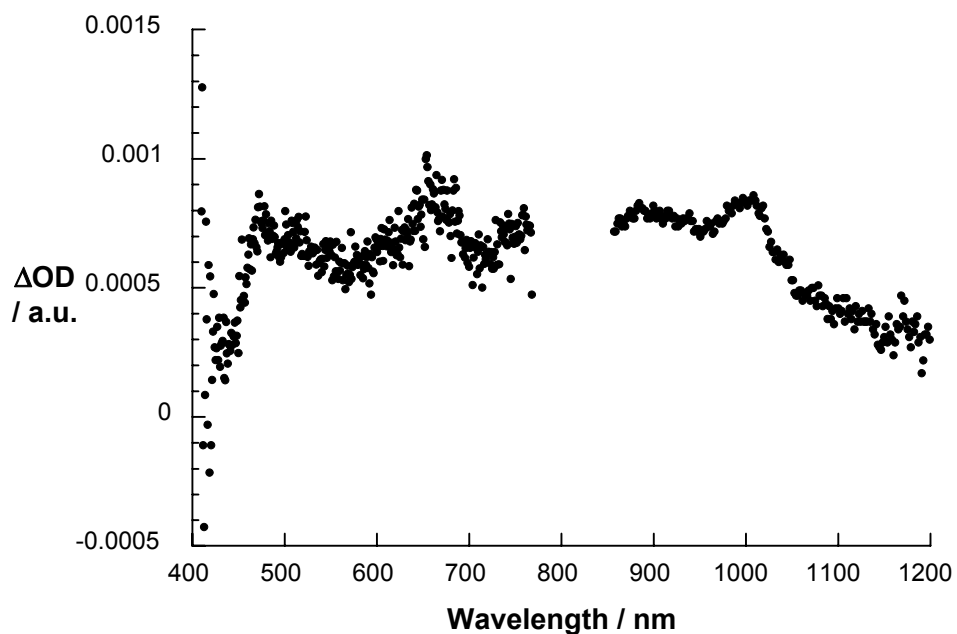

**Figure S3:** Differential absorption spectrum (visible and near-infrared) obtained upon femtosecond flash photolysis (387 nm) of  $C_{60}$ -oFl<sub>2</sub>-exTTF in nitrogen saturated THF ( $1.0 \times 10^{-5}$  M) with a time delay of 155 ps at room temperature.

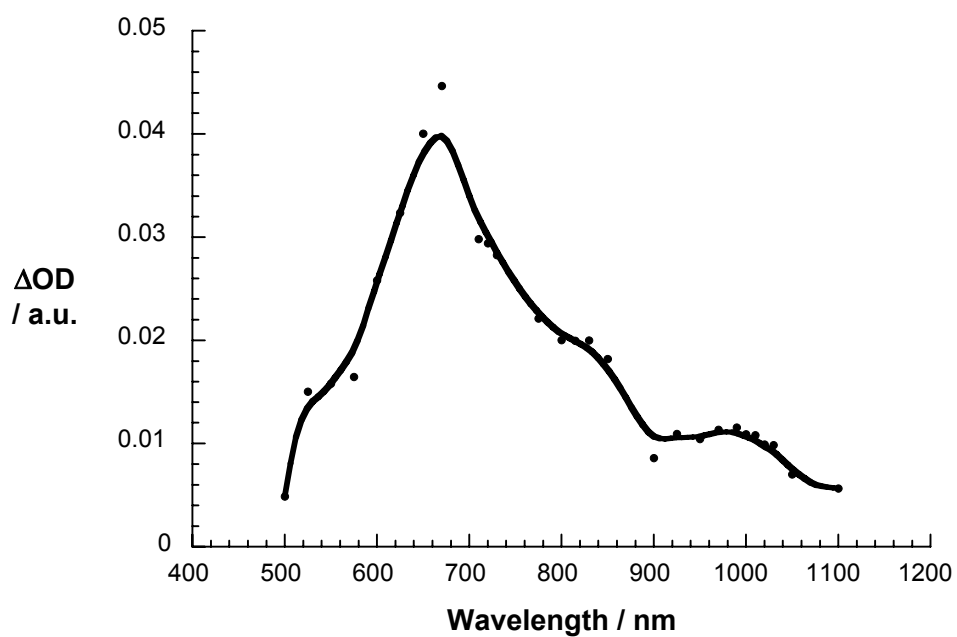

**Figure S4:** Differential absorption spectrum (visible and near-infrared) obtained upon nanosecond flash photolysis (355 nm) of  $C_{60}$ -oFl<sub>2</sub>-exTTF in nitrogen saturated THF ( $1.0 \times 10^{-5}$  M) with a time delay of 100 ns at room temperature.
